# Supplementary material for: Protruding cantilever microelectrode array to monitor the inner electrical activity of cerebral organoids
Source: Royal Society of Chemistry journal article supplement (doi:10.1039/d3lc00294b), 2023-01-01
Supplement: d3lc00294b1.pdf [file d3lc00294b1.pdf]

## Electronic Supplementary Informations

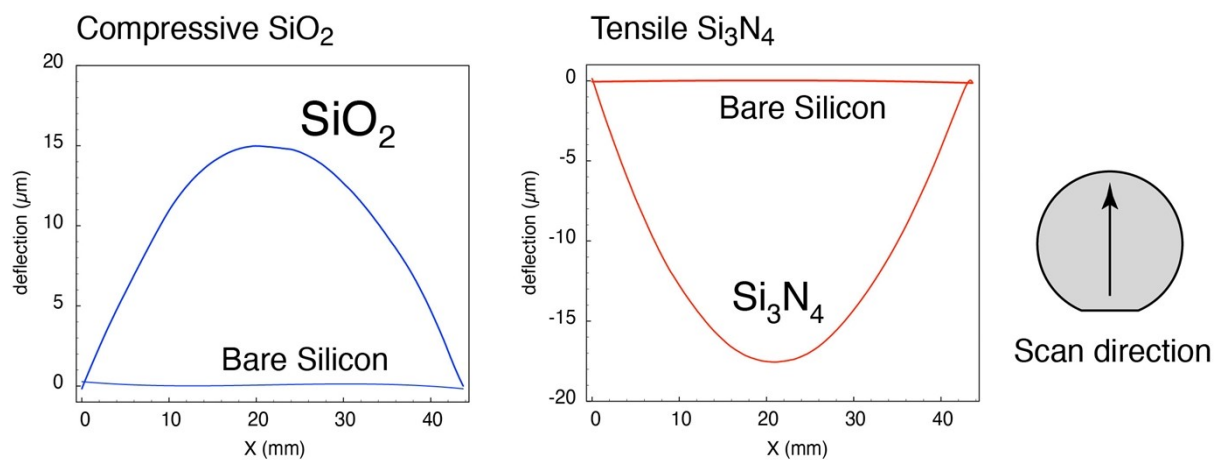

**Fig. ESI 1.** Stress analysis of thin film layers. 40 mm long profiles of 3 inches silicon wafers measured with Dektak mechanical stylus profilometers on bare and thin film PECVD deposited silicon wafer. Left with Compressive SiO<sub>2</sub> layer and right with tensile Si<sub>3</sub>N<sub>4</sub> layer.

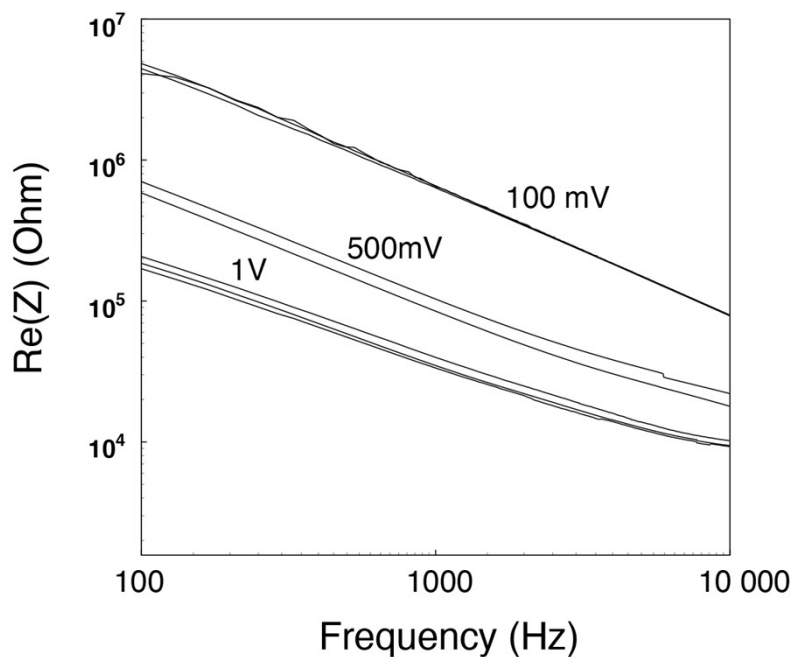

**Fig. ESI 2.** Impedance analysis, real part of the impedance of different electrodes as function of the frequency and for different values of peak to peak signal.

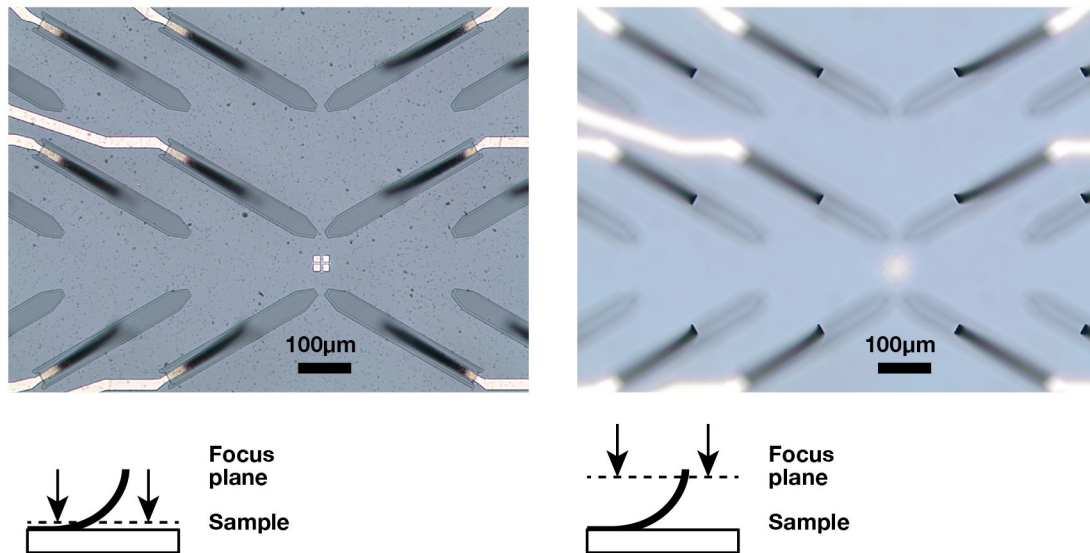

**Fig. ESI 3.** Optical microscope photographs of the MEAs (10X objective) at two distinct focal plane, left on the surface of the sample and right at the apex of the beams.

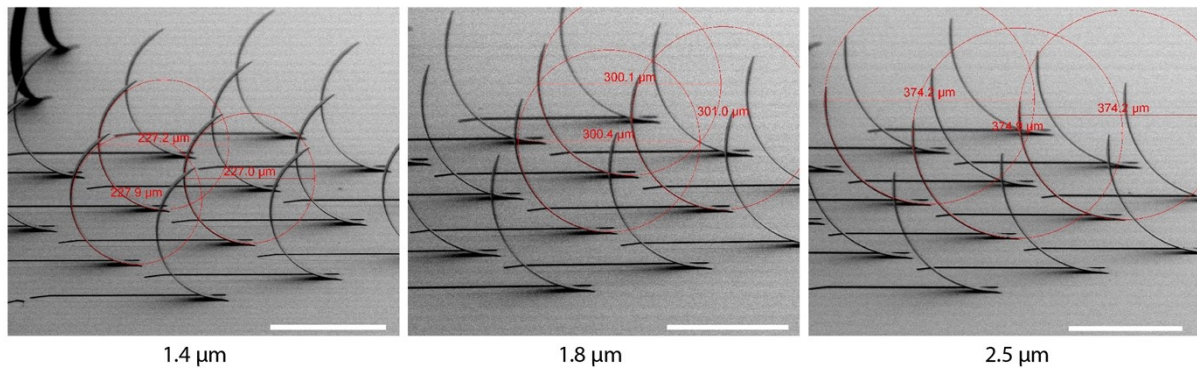

**Fig. ESI 4.** Radius of curvature measurement of cantilevers of different thickness using scanning electron microscopy.

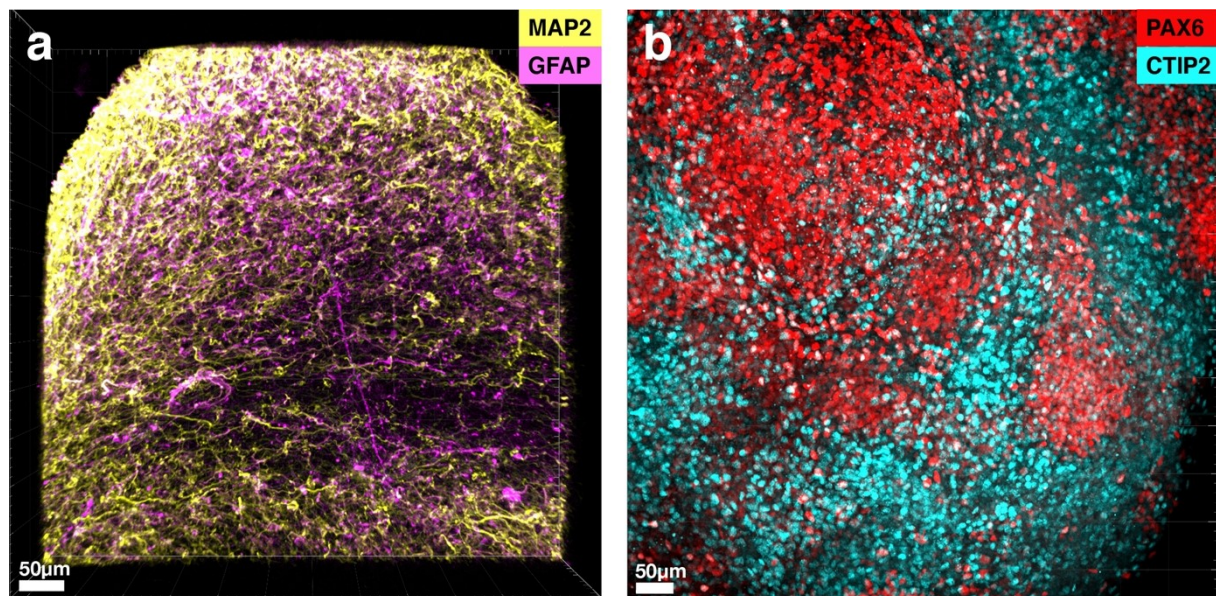

**Fig. ESI 5.** Cortical organoids were cultured for 44 days, cut into 300-μm slices and prepared for immunostaining. Confocal image acquisition revealed neurons (a, MAP2, yellow), astrocytes (a, GFAP, purple), neural progenitor cells (b, Pax6, red), and neuron (layers V and VI) nuclei (b, CTIP2, cyan).

| #  | Step                                      | Process                                                                                                                         | Cross section schematic                                                               |
|----|-------------------------------------------|---------------------------------------------------------------------------------------------------------------------------------|---------------------------------------------------------------------------------------|
| 1  | Glass substrate                           | 4.9x4.9 cm, 500 µm thick glass blades (Paul Marienfeld GmbH)                                                                    |    |
| 2  | Substrate cleaning                        | Piranha etch (sulfuric acid and peroxide)                                                                                       |    |
| 2  | Aluminium sacrificial layer deposition    | Evaporation of 300nm thick aluminium, whole plate                                                                               |    |
| 3  | First lithography, mask #1                | AZ 1518 (Microchemicals GmbH, Germany), spincoat 3000 rpm, baking 110°C, development                                            |    |
| 4  | Aluminium etching                         | H <sub>3</sub> PO <sub>4</sub> , HNO <sub>3</sub> , CH <sub>3</sub> COOH, H <sub>2</sub> O (80/5/5/10%) at 40°C                 |    |
| 5  | SiO <sub>2</sub> deposition               | PECVD, 280°C, whole plate, 300s deposition time                                                                                 |   |
| 6  | Second lithography mask #2                | AZ nLOF 2020, spincoat 3000rpm, baking 110°C 1minute, exposure and post exposure bake 110°C, development, plasma oxygen hashing |  |
| 7  | Metal deposition                          | Electron gun evaporation. Ti/Au 20/150nm                                                                                        |  |
| 8  | Metal Lift off                            | Remover PG, 80°C, 10minutes                                                                                                     |  |
| 9  | Si <sub>3</sub> N <sub>4</sub> deposition | PECVD, 280°C, whole plate, 300s deposition time                                                                                 |  |
| 10 | Third lithography mask #3                 | AZ nLOF 2020, spincoat 3000rpm, baking 110°C 1minute, exposure and post exposure bake 110°C, development, plasma oxygen hashing |  |

|    |                                                 |                                                                                                                                                                                              |                                                                                       |
|----|-------------------------------------------------|----------------------------------------------------------------------------------------------------------------------------------------------------------------------------------------------|---------------------------------------------------------------------------------------|
| 11 | Pad and active sites opening                    | ICP RIE Plasma dry etch of Si <sub>3</sub> N <sub>4</sub> layer. CHF <sub>3</sub> /O <sub>2</sub> gazes, 100W. Laser interferometry etching end detection on Au layer.                       | 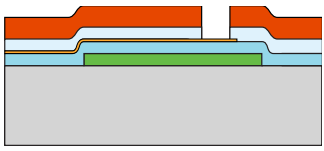   |
| 12 | Resist stripping                                | ICP RIE Plasma dry O <sub>2</sub> + remover PG                                                                                                                                               |    |
| 13 | Fourth lithography mask #4                      | AZ nLOF 2020, spincoat 3000rpm, baking 110°C 1minute, exposure and post exposure bake 110°C, development, plasma oxygen hashing                                                              |    |
| 14 | Cantilever opening                              | ICP RIE Plasma dry etch of Si <sub>3</sub> N <sub>4</sub> and SiO <sub>2</sub> layers. CHF <sub>3</sub> /O <sub>2</sub> gazes, 100W. Laser interferometry etching end detection on Al layer. |    |
| 15 | Resist stripping                                | ICP RIE Plasma dry O <sub>2</sub> + remover PG + final piranha cleaning                                                                                                                      |   |
| 16 | Cantilever release<br>Sacrificial layer etching | H <sub>3</sub> PO <sub>4</sub> , HNO <sub>3</sub> , CH <sub>3</sub> COOH, H <sub>2</sub> O (80/5/5/10%) at 40°C + DIW rinse + IPA rinse + N <sub>2</sub> drying                              |  |

**Table ESI 1.** Process chart
